# Supplementary material for: Understanding the Gastrointestinal Behavior of the Coffee Pulp Phenolic Compounds under Simulated Conditions
Source: MDPI journal article supplement (doi:10.3390/antiox11091818), 2022-09-15
Supplement: s1 [file s1]

# **Understanding the gastrointestinal behavior of the coffee pulp phenolic compounds under simulated conditions**

Silvia Cañas<sup>1,2</sup>, Miguel Rebollo-Hernanz<sup>1,2</sup>, Cheyenne Braojos<sup>1,2</sup>, Vanesa Benítez<sup>1,2</sup>, Rebeca Ferreras-Charro<sup>3</sup>, Montserrat Dueñas<sup>3</sup>, Yolanda Aguilera<sup>1,2</sup>, María A. Martín-Cabrejas<sup>1,2</sup>

<sup>1</sup> Department of Agricultural Chemistry and Food Science, Faculty of Science, C/ Francisco Tomás y Valiente, 7. Universidad Autónoma de Madrid, 28049, Madrid, Spain.

<sup>2</sup> Institute of Food Science Research (CIAL, UAM-CSIC). C/ Nicolás Cabrera, 9. Universidad Autónoma de Madrid, 28049, Madrid, Spain.

<sup>3</sup> Grupo de Investigación en Polifenoles, Unidad de Nutrición y Bromatología, Facultad de Farmacia, Universidad de Salamanca, Campus Miguel de Unamuno, 37007 Salamanca, Spain

**Table S1.** Retention index, bioaccessibility, and potential bioavailability (%) of phenolic families from coffee pulp flour (CPF) and extract (CPE) after *in vitro* digestion.

| Compounds                   | Retention Index                   |                                 | Bioaccessibility                |                                  | Bioavailability                |                                |
|-----------------------------|-----------------------------------|---------------------------------|---------------------------------|----------------------------------|--------------------------------|--------------------------------|
|                             | OP                                | GP                              | IP                              | CP                               | C2A                            | HIA                            |
| <b>Coffee Pulp Flour</b>    |                                   |                                 |                                 |                                  |                                |                                |
| <i>Phenolic acids</i>       |                                   |                                 |                                 |                                  |                                |                                |
| Total Hydroxybenzoic acids  | 61.1 ± 2.7 <sup>abc***</sup>      | 70.3 ± 2.5 <sup>ab**</sup>      | 79.0 ± 12.6 <sup>a</sup>        | 53.9 ± 6.5 <sup>abc*</sup>       | 66.9 ± 10.7 <sup>abc</sup>     | 48.6 ± 7.8 <sup>c</sup>        |
| Total Hydroxycinnamic acids | 50.7 ± 2.5 <sup>b***</sup>        | 71.1 ± 7.2 <sup>a</sup>         | 82.3 ± 11.4 <sup>a**</sup>      | 46.6 ± 7.1 <sup>b***</sup>       | 12.4 ± 1.7 <sup>c**</sup>      | 22.8 ± 3.1 <sup>c**</sup>      |
| <b>Total Phenolic acids</b> | <b>57.7 ± 2.7<sup>bc***</sup></b> | <b>70.6 ± 5.8<sup>ab*</sup></b> | <b>80.1 ± 12.2<sup>a*</sup></b> | <b>51.5 ± 6.7<sup>cd**</sup></b> | <b>48.8 ± 7.9<sup>cd</sup></b> | <b>40.0 ± 6.3<sup>d</sup></b>  |
| <i>Flavonoids</i>           |                                   |                                 |                                 |                                  |                                |                                |
| Total Flavones              | 27.8 ± 1.5 <sup>c**</sup>         | 53.3 ± 7.1 <sup>a*</sup>        | 41.9 ± 6.8 <sup>b</sup>         | 31.3 ± 3.5 <sup>c</sup>          | 5.0 ± 0.8 <sup>d</sup>         | 7.8 ± 3.1 <sup>d</sup>         |
| Total Flavonols             | 38.9 ± 3.3 <sup>b***</sup>        | 61.8 ± 8.3 <sup>a**</sup>       | 58.7 ± 8.9 <sup>a</sup>         | 12.5 ± 1.9 <sup>c</sup>          | 14.1 ± 2.4 <sup>c</sup>        | 13.6 ± 2.2 <sup>c</sup>        |
| <b>Total Flavonoids</b>     | <b>35.8 ± 2.8<sup>b***</sup></b>  | <b>59.4 ± 7.9<sup>a**</sup></b> | <b>54.0 ± 8.3<sup>a</sup></b>   | <b>17.7 ± 2.3<sup>c</sup></b>    | <b>11.6 ± 1.9<sup>c</sup></b>  | <b>12.0 ± 1.9<sup>c</sup></b>  |
| <b>Total Phenolics</b>      | <b>56.2 ± 2.7<sup>bc***</sup></b> | <b>69.8 ± 5.9<sup>ab*</sup></b> | <b>78.4 ± 12.0<sup>a</sup></b>  | <b>49.3 ± 6.5<sup>cd**</sup></b> | <b>46.4 ± 7.6<sup>cd</sup></b> | <b>38.2 ± 6.1<sup>d*</sup></b> |
| <b>Coffee Pulp Extract</b>  |                                   |                                 |                                 |                                  |                                |                                |
| <i>Phenolic acids</i>       |                                   |                                 |                                 |                                  |                                |                                |
| Total Hydroxybenzoic acids  | 105.5 ± 8.2 <sup>a***</sup>       | 91.8 ± 10.9 <sup>ab</sup>       | 63.8 ± 9.3 <sup>cd</sup>        | 78.7 ± 12.0 <sup>bc</sup>        | 53.8 ± 7.9 <sup>de</sup>       | 39.1 ± 5.7 <sup>e</sup>        |
| Total Hydroxycinnamic acids | 104.5 ± 5.3 <sup>a</sup>          | 84.3 ± 8.2 <sup>b</sup>         | 52.3 ± 2.5 <sup>c</sup>         | 104.4 ± 12.7 <sup>a</sup>        | 7.7 ± 0.3 <sup>d</sup>         | 14.5 ± 0.8 <sup>d</sup>        |
| <b>Total Phenolic acids</b> | <b>105.2 ± 7.2<sup>a</sup></b>    | <b>89.3 ± 10.0<sup>a</sup></b>  | <b>60.0 ± 7.0<sup>b</sup></b>   | <b>87.1 ± 12.3<sup>a</sup></b>   | <b>38.7 ± 5.2<sup>c</sup></b>  | <b>31.1 ± 4.0<sup>c</sup></b>  |
| <i>Flavonoids</i>           |                                   |                                 |                                 |                                  |                                |                                |
| Total Flavones              | 87.5 ± 25.8 <sup>a</sup>          | 86.5 ± 22.5 <sup>a</sup>        | —                               | —                                | —                              | —                              |
| Total Flavonols             | 105.4 ± 8.2 <sup>a</sup>          | 95.3 ± 10.6 <sup>a</sup>        | —                               | —                                | —                              | —                              |
| <b>Total Flavonoids</b>     | <b>100.9 ± 13.1<sup>a</sup></b>   | <b>93.0 ± 13.8<sup>a</sup></b>  | —                               | —                                | —                              | —                              |
| <b>Total Phenolics</b>      | <b>105.0 ± 7.5<sup>a</sup></b>    | <b>89.9 ± 10.2<sup>ab</sup></b> | <b>56.9 ± 6.7<sup>c*</sup></b>  | <b>82.6 ± 11.8<sup>b</sup></b>   | <b>36.7 ± 5.0<sup>d</sup></b>  | <b>29.4 ± 3.8<sup>d</sup></b>  |

Results are reported as mean ± SD ( $n = 3$ ). Mean values within a line followed by different superscript letters (a, b, c, d, e) are significantly different when subjected to Tukey's test ( $p < 0.05$ ). OP: Oral Phase; GP: Gastric Phase; IP: Intestinal Phase; CP: Colonic Phase; C2A: Caco-2 Absorption; HIA: Human Intestinal Absorption. Mean values followed by superscript asterisks significantly differ (CPF vs. CPE) when subjected to *T*-test (\*  $p < 0.05$ , \*\*  $p < 0.01$ , \*\*\*  $p < 0.001$ ).

**Table S2.** Physicochemical properties and intestinal absorption of the phenolic metabolites from the coffee pulp *in silico* colonic metabolism.

| Phenolic Compound                                                   | Common name                | Abbreviation | M <sub>w</sub> | LogP  | C2A         | HIA         |
|---------------------------------------------------------------------|----------------------------|--------------|----------------|-------|-------------|-------------|
| Quercetin 3,7-diglucoside                                           | –                          | Q3,7G        | 626.5          | –3.07 | 11.0 ± 2.5  | 7.6 ± 3.1   |
| Quercetin 3-rutinoside                                              | Rutin                      | RUT          | 610.5          | –1.69 | 13.7 ± 3.5  | 22.2 ± 1.2  |
| Apigenin 6,8- <i>C</i> -diglucoside                                 | Vicenin-2                  | VIC2         | 594.5          | –2.39 | 11.9 ± 3.9  | 18.6 ± 4.0  |
| 3,5-Dicaffeoylquinic acid                                           | Isochlorogenic acid A      | 3,5-dCQA     | 516.4          | 1.03  | 10.2 ± 3.7  | 34.2 ± 9.7  |
| Quercetin 3-glucoside                                               | Isoquercetin               | Q3G          | 464.4          | –0.54 | 44.1 ± 12.3 | 31.7 ± 16.2 |
| Quercetin 7-glucoside                                               | Quercimeritrin             | Q7G          | 464.4          | –0.54 | 44.5 ± 13.1 | 24.6 ± 9.1  |
| Apigenin 6- <i>C</i> -glucoside                                     | Isovitexin                 | API6G        | 432.4          | 0.09  | 24.2 ± 5.0  | 45.5 ± 19.2 |
| 3- <i>O</i> -Caffeoylquinic acid                                    | Chlorogenic acid           | 3-CQA        | 354.3          | –0.65 | 15.3 ± 3.4  | 34.4 ± 1.9  |
| 4- <i>O</i> -Caffeoylquinic acid                                    | Cryptochlorogenic acid     | 4-CQA        | 354.3          | –0.65 | 15.2 ± 3.8  | 26.3 ± 6.2  |
| 5- <i>O</i> -Caffeoylquinic acid                                    | Neochlorogenic acid        | 5-CQA        | 354.3          | –0.65 | 15.3 ± 3.4  | 34.4 ± 1.9  |
| 5- <i>p</i> -Coumaroylquinic acid                                   | –                          | 5-CouQA      | 338.3          | –0.35 | 24.7 ± 5.8  | 38.1 ± 5.9  |
| 3-(3,4-Dihydroxyphenyl)-1-(2,4,6-trihydroxyphenyl)propane-1,2-dione | Dihydroquercetin chalcone  | dhQCH        | 304.2          | 1.21  | 30.3 ± 4.0  | 44.3 ± 13.9 |
| 3,3',4',5,7-Pentahydroxyflavanone                                   | Dihydroquercetin           | dhQ          | 304.2          | 1.19  | 60.3 ± 20.2 | 54.3 ± 10.5 |
| 3,3',4',5,7-Pentahydroxyflavone                                     | Quercetin                  | Q            | 302.2          | 1.99  | 36.6 ± 3.9  | 60.5 ± 16.7 |
| 3-(3-Hydroxyphenyl)-1-(2,4,6-trihydroxyphenyl)propane-1,2-dione     | –                          | THdhFLCH     | 288.2          | 1.50  | 53.7 ± 8.7  | 45.5 ± 13.1 |
| 3,3',5,7-Tetrahydroxyflavanone                                      | –                          | THdhFL       | 288.2          | 1.48  | 80.6 ± 8.9  | 53.0 ± 6.0  |
| 3-(4-Hydroxyphenyl)-1-(2,4,6-trihydroxyphenyl)propane-1,2-dione     | Dihydrokaempferol chalcone | dhKMPCH      | 288.2          | 1.50  | 49.2 ± 12.4 | 47.7 ± 14.6 |
| 3,4',5,7, -Tetrahydroxyflavanone                                    | Dihydrokaempferol          | dhKMP        | 288.2          | 1.48  | 81.0 ± 8.7  | 53.0 ± 6.0  |
| 3,4',5,7-Tetrahydroxyflavone                                        | Kaempferol                 | KMP          | 286.2          | 2.28  | 72.8 ± 13.0 | 60.6 ± 13.6 |
| 3,3',5,7-Tetrahydroxyflavone                                        | –                          | THFL         | 286.2          | 2.28  | 72.9 ± 12.6 | 63.9 ± 16.9 |
| 2',4,4',6'-Tetrahydroxydihydrochalcone                              | Phloretin                  | PT           | 274.3          | 2.32  | 61.1 ± 18.3 | 51.6 ± 8.9  |
| 3-Phenyl-1-(2,4,6-trihydroxyphenyl)-1,2-propanedione                | Dydrogalangin chalcone     | dhGLCH       | 272.2          | 1.80  | 65.7 ± 17.6 | 49.3 ± 16.2 |
| 4',5,7-trihydroxyflavanone                                          | Naringenin                 | NAR          | 272.2          | 2.51  | 96.9 ± 1.8  | 71.7 ± 19.7 |
| 2',4,4',6'-Tetrahydroxychalcone                                     | Naringenin chalcone        | NARCH        | 272.2          | 2.41  | 62.7 ± 17.6 | 54.1 ± 6.9  |
| 3,5,7-Trihydroxyflavanone                                           | Dihydrogalangin            | dhGL         | 272.2          | 1.78  | 96.1 ± 2.1  | 69.1 ± 22.1 |
| 3,5,7-Trihydroxyflavone                                             | Galangin                   | GL           | 270.2          | 2.58  | 95.1 ± 2.4  | 70.5 ± 23.5 |
| 4',5,7-Trihydroxyflavone                                            | Apigenin                   | API          | 270.2          | 2.58  | 95.9 ± 2.2  | 73.2 ± 20.1 |
| 2',4',6'-Trihydroxydihydrochalcone                                  | Dihydrochrysin chalcone    | dhCHRYCH     | 258.3          | 2.62  | 95.9 ± 2.2  | 67.0 ± 24.3 |

|                                   |                              |                |       |      |             |             |
|-----------------------------------|------------------------------|----------------|-------|------|-------------|-------------|
| 5,7-Dihydroxyflavanone            | Pinocembrin                  | PB             | 256.2 | 2.80 | 96.3 ± 2.0  | 71.6 ± 19.6 |
| 2',4',6'-Tetrahydroxychalcone     | Pinocembrin chalcone         | PBCH           | 256.2 | 2.70 | 96.0 ± 2.2  | 69.2 ± 22.0 |
| 5,7-Dihydroxyflavanone            | Dihydrochrysin               | dhCHRY         | 256.2 | 2.80 | 96.9 ± 1.7  | 72.2 ± 20.2 |
| 5,7-Dihydroxyflavone              | Chrysin                      | CHRY           | 254.2 | 2.87 | 95.6 ± 2.3  | 73.4 ± 20.3 |
| 3,4-Dihydroxyphenylpyruvic acid   | –                            | 3,4-HPPyA      | 196.2 | 0.29 | 66.9 ± 12.2 | 43.8 ± 3.1  |
| 3,4-Dihydroxydihydrocinnamic acid | Dihydrocaffeic acid          | dhCA           | 182.2 | 1.12 | 91.8 ± 3.0  | 57.4 ± 12.0 |
| 3,4-Dihydroxycinnamic acid        | Caffeic acid                 | CA             | 180.2 | 1.20 | 80.5 ± 8.3  | 64.5 ± 8.9  |
| 3-Hydroxyphenylpyruvic acid       | –                            | 3-HPPyA        | 180.2 | 0.59 | 92.3 ± 3.0  | 60.2 ± 17.2 |
| 4-Hydroxyphenylpyruvic acid       | –                            | 4-HPPyA        | 180.2 | 0.59 | 93.4 ± 2.8  | 60.6 ± 16.4 |
| 3,4,5-Trihydroxybenzoic acid      | Gallic acid                  | GA             | 170.1 | 0.50 | 53.9 ± 6.6  | 43.2 ± 0.1  |
| 2,4,6-Trihydroxybenzoic acid      | Phloroglucinic acid          | PGA            | 170.1 | 0.50 | 51.6 ± 8.9  | 38.2 ± 8.4  |
| 4-Hydroxy-3-methoxybenzoic acid   | Vanillic acid                | VA             | 168.1 | 1.10 | 93.2 ± 2.9  | 71.3 ± 7.6  |
| 3,4-Dihydroxyphenylacetic acid    | Homoprotocatechuic acid      | 3,4-HPAA       | 168.1 | 0.72 | 90.7 ± 3.1  | 57.0 ± 7.7  |
| 3-(3-Hydroxyphenyl)propionic acid | <i>m</i> -Hydrocoumaric acid | 3,3-HPPA       | 166.2 | 1.41 | 96.9 ± 1.8  | 79.2 ± 12.2 |
| 3-(4-Hydroxyphenyl)propionic acid | Phloretic acid               | 3,4-HPPA       | 166.2 | 1.41 | 97.1 ± 1.7  | 81.1 ± 12.6 |
| 4-Hydroxycinnamic acid            | <i>p</i> -Coumaric acid      | <i>p</i> -CouA | 164.2 | 1.49 | 97.0 ± 1.7  | 82.8 ± 8.3  |
| 3-Hydroxycinnamic acid            | <i>m</i> -Coumaric acid      | <i>m</i> -CouA | 164.2 | 1.49 | 96.9 ± 1.8  | 82.8 ± 8.3  |
| Phenylpyruvic acid                | –                            | PPyA           | 164.2 | 0.88 | 97.5 ± 1.5  | 74.7 ± 6.3  |
| 3,4-Dihydroxybenzoic acid         | Protocatechuic acid          | PCA            | 154.1 | 0.80 | 87.4 ± 4.5  | 63.1 ± 8.0  |
| 3,5-Dihydroxybenzoic acid         | $\alpha$ -Resorcylic acid    | $\alpha$ -RA   | 154.1 | 0.80 | 89.9 ± 3.5  | 61.4 ± 14.0 |
| 3-Hydroxyphenylacetic acid        | –                            | 3-HPAA         | 152.5 | 1.02 | 96.9 ± 1.8  | 76.0 ± 6.1  |
| 3-Methoxybenzoic acid             | <i>m</i> -Anisic acid        | <i>m</i> -AnA  | 152.1 | 1.39 | 97.7 ± 1.3  | 91.4 ± 8.7  |
| 4-Hydroxyphenylacetic acid        | –                            | 4-HPAA         | 152.1 | 1.02 | 96.8 ± 1.8  | 79.1 ± 7.2  |
| 3-Phenylpropionic acid            | Hydrocinnamic acid           | hCiA           | 150.2 | 1.70 | 99.0 ± 0.6  | 90.5 ± 4.5  |
| Cinnamic acid                     | –                            | CiA            | 148.2 | 1.78 | 98.8 ± 0.7  | 91.8 ± 2.3  |
| 4-Hydroxybenzoic acid             | <i>p</i> -Salicylic acid     | <i>p</i> -SA   | 138.1 | 1.09 | 97.1 ± 1.7  | 79.3 ± 4.7  |
| 3-Hydroxybenzoic acid             | <i>m</i> -Salicylic acid     | <i>m</i> -SA   | 138.1 | 1.09 | 96.9 ± 1.8  | 76.8 ± 2.2  |
| Phenylacetic acid                 | –                            | PAA            | 136.1 | 1.31 | 99.0 ± 0.6  | 86.5 ± 1.1  |
| Benzoic acid                      | –                            | BA             | 122.1 | 1.38 | 99.2 ± 0.5  | 94.6 ± 4.7  |

M<sub>w</sub>: molecular weight; logP: partition coefficient; C2A: Caco-2 Absorption; HIA: Human Intestinal Absorption

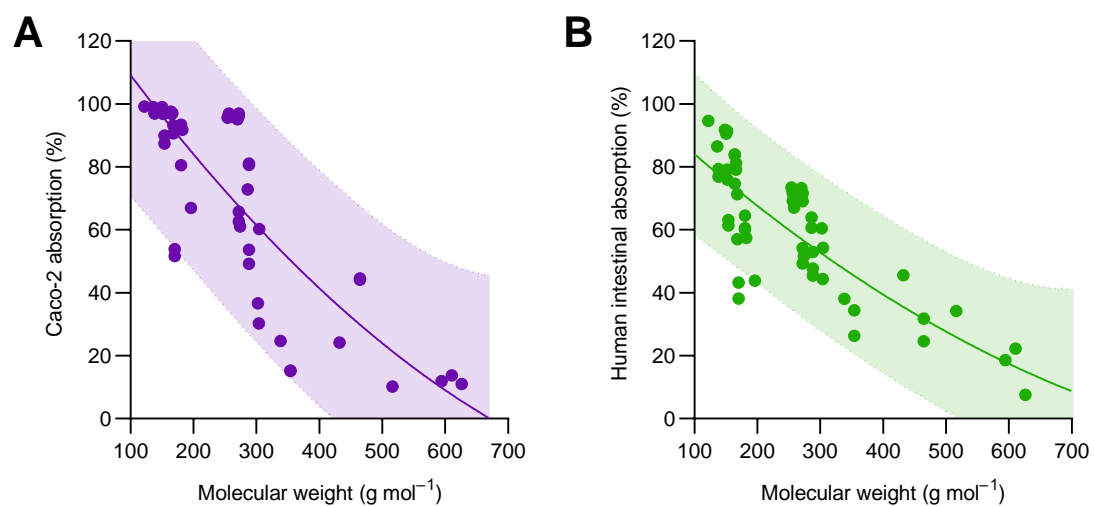

**Figure S1.** Association between the molecular weight of the coffee pulp phenolic metabolites and their Caco-2 (**A**) and human intestinal (**B**) absorption.
